# Supplementary material for: Ciliary Neurotrophic Factor Acts on Distinctive Hypothalamic Arcuate Neurons and Promotes Leptin Entry Into and Action on the Mouse Hypothalamus
Source: PubMed Central journal article supplement (PMC7253709; doi:10.3389/fncel.2020.00140), 2020-05-21
Supplement: Data_Sheet_1.pdf [file Data_Sheet_1.pdf]

Supplementary table 1 – Primary and secondary antibodies used in the study.

**TABLE 1A** | Primary antibodies.

| <b>Antibodies</b>              | <b>Host*</b> | <b>Dilution</b>               | <b>Source</b>                     |
|--------------------------------|--------------|-------------------------------|-----------------------------------|
| <b>Albumin</b>                 | G            | 1:4000 (IF)                   | Novus Biologicals, NB600-41532    |
| <b>ERK1/2</b>                  | R            | 1:1000 (WB)                   | Cell Signaling Technology, 9102   |
| <b>GFP</b>                     | R            | 1:300 (IF)                    | Cell Signaling Technology, 2956   |
| <b>Leptin</b>                  | R            | 1:1000 (WB)                   | Peprtech, 500-P68                 |
| <b>Nestin</b>                  | M            | 1:400 (IF)                    | Merck, MAB353                     |
| <b>pERK1/2 (Thr202/Tyr204)</b> | R            | 1:2000 (WB), 1:3000 (IHC, IF) | Cell Signaling Technology, 4370   |
| <b>pSTAT3 (Tyr705)</b>         | R            | 1:1000 (WB), 1: 900 (IHC, IF) | Cell Signaling Technology, 9145   |
| <b>pSTAT3 (Tyr705)</b>         | G            | 1:600 (IF)                    | Santa Cruz Biotechnology, sc-7993 |
| <b>STAT3</b>                   | M            | 1:1000 (WB)                   | Cell Signaling Technology, 9132   |
| <b>Vimentin</b>                | G            | 1:400 (IF)                    | Santa Cruz Biotechnology, sc-7557 |

\* R, rabbit; M, mouse; G, goat; WB, western blotting; IHC, immunohistochemistry; IF, immunofluorescence.

**TABLE 1B** | Secondary antibodies.

| <b>Conjugated to</b> | <b>React*</b> | <b>Dilution</b> | <b>Source</b>                       |
|----------------------|---------------|-----------------|-------------------------------------|
| Fluorophore          | R             | 1:400 (IF)      | Invitrogen, A21206                  |
| Fluorophore          | R             | 1:400 (IF)      | Invitrogen, A31572                  |
| Fluorophore          | G             | 1:400 (IF)      | Invitrogen, A11055                  |
| Fluorophore          | G             | 1:400 (IF)      | Invitrogen, A21432                  |
| Fluorophore          | G             | 1:400 (IF)      | Invitrogen, A21082                  |
| Fluorophore          | M             | 1:400 (IF)      | Invitrogen, A21202                  |
| Peroxidase           | R             | 1:200 (IHC)     | Vector Laboratories, BA-1000        |
| Peroxidase           | M             | 1:5000 (WB)     | Jackson ImmunoResearch, 715-036-150 |
| Peroxidase           | R             | 1:5000 (WB)     | Jackson ImmunoResearch, 711-036-152 |

\* R, rabbit; G, goat; M, mouse.

Supplementary figure 1

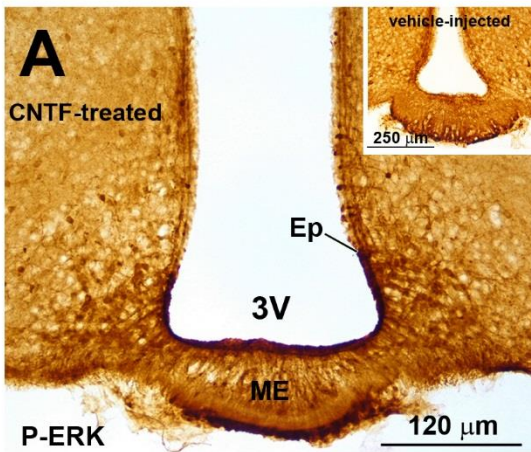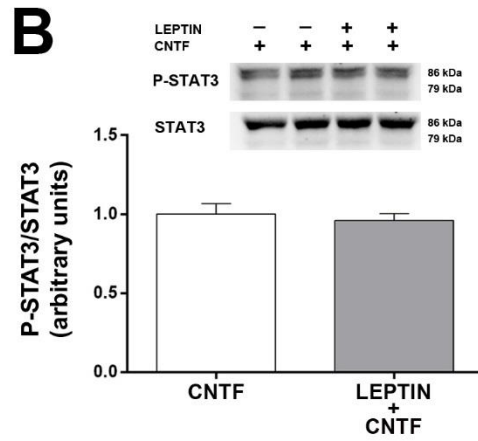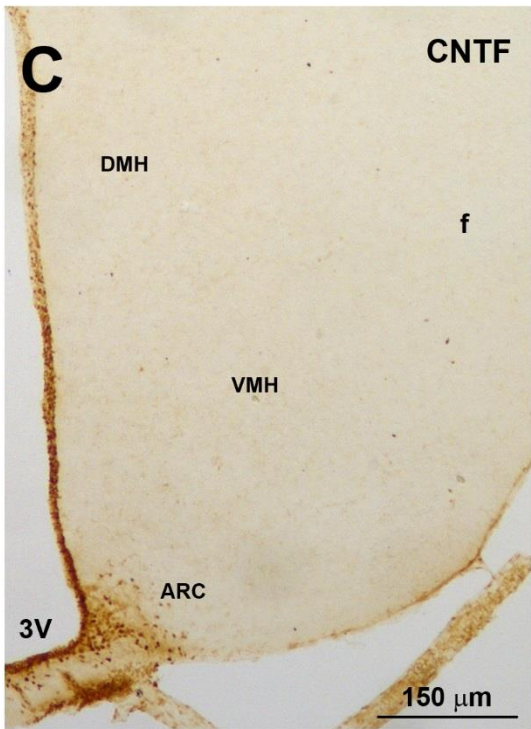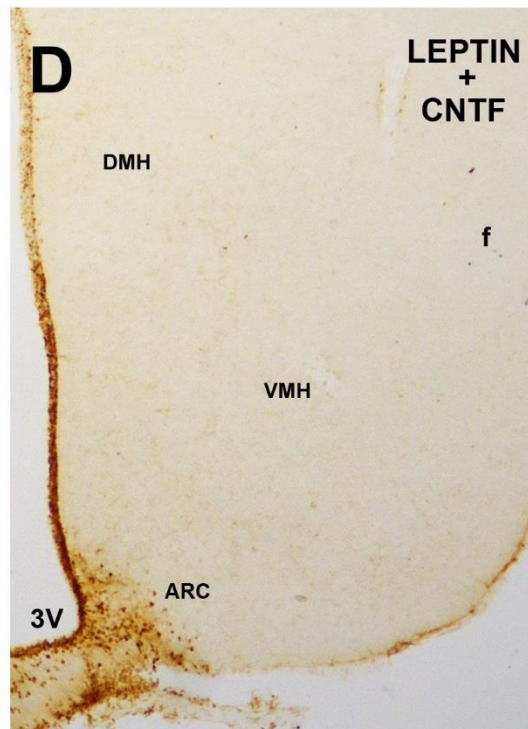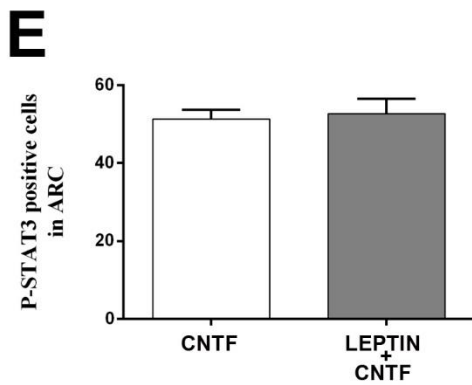

Supplementary figure 1 - CNTF administration to obese *db/db* mice. A: Representative immunoperoxidase image showing P-ERK immunoreactivity in the ependyma (Ep) lining the infundibular recess of the third ventricle (3V) from a *db/db* mouse treated with CNTF. The inset shows the corresponding region from a vehicle-injected mouse. B: Representative immunoblot and quantification of P-STAT3 content in hypothalamic protein extracts from *db/db* mice treated with CNTF or CNTF/leptin. Data (3 mice) are mean  $\pm$  SEM (one-way ANOVA). C and D: Representative P-STAT3 immunoperoxidase staining from *db/db* mice treated with CNTF (C) or CNTF/leptin (D). ARC, arcuate nucleus; VMH, ventromedial hypothalamus; DMH, dorsomedial hypothalamic nucleus; f, fornix; All pics were taken from coronal hypothalamic sections at bregma – 1.70 mm. E: Number of P-STAT3-positive neurons in the ARC of CNTF- and CNTF/leptin-treated mice from three coronal sections. Data (3 mice) are mean  $\pm$  SEM (unpaired Student's t-test).

Supplementary figure 2

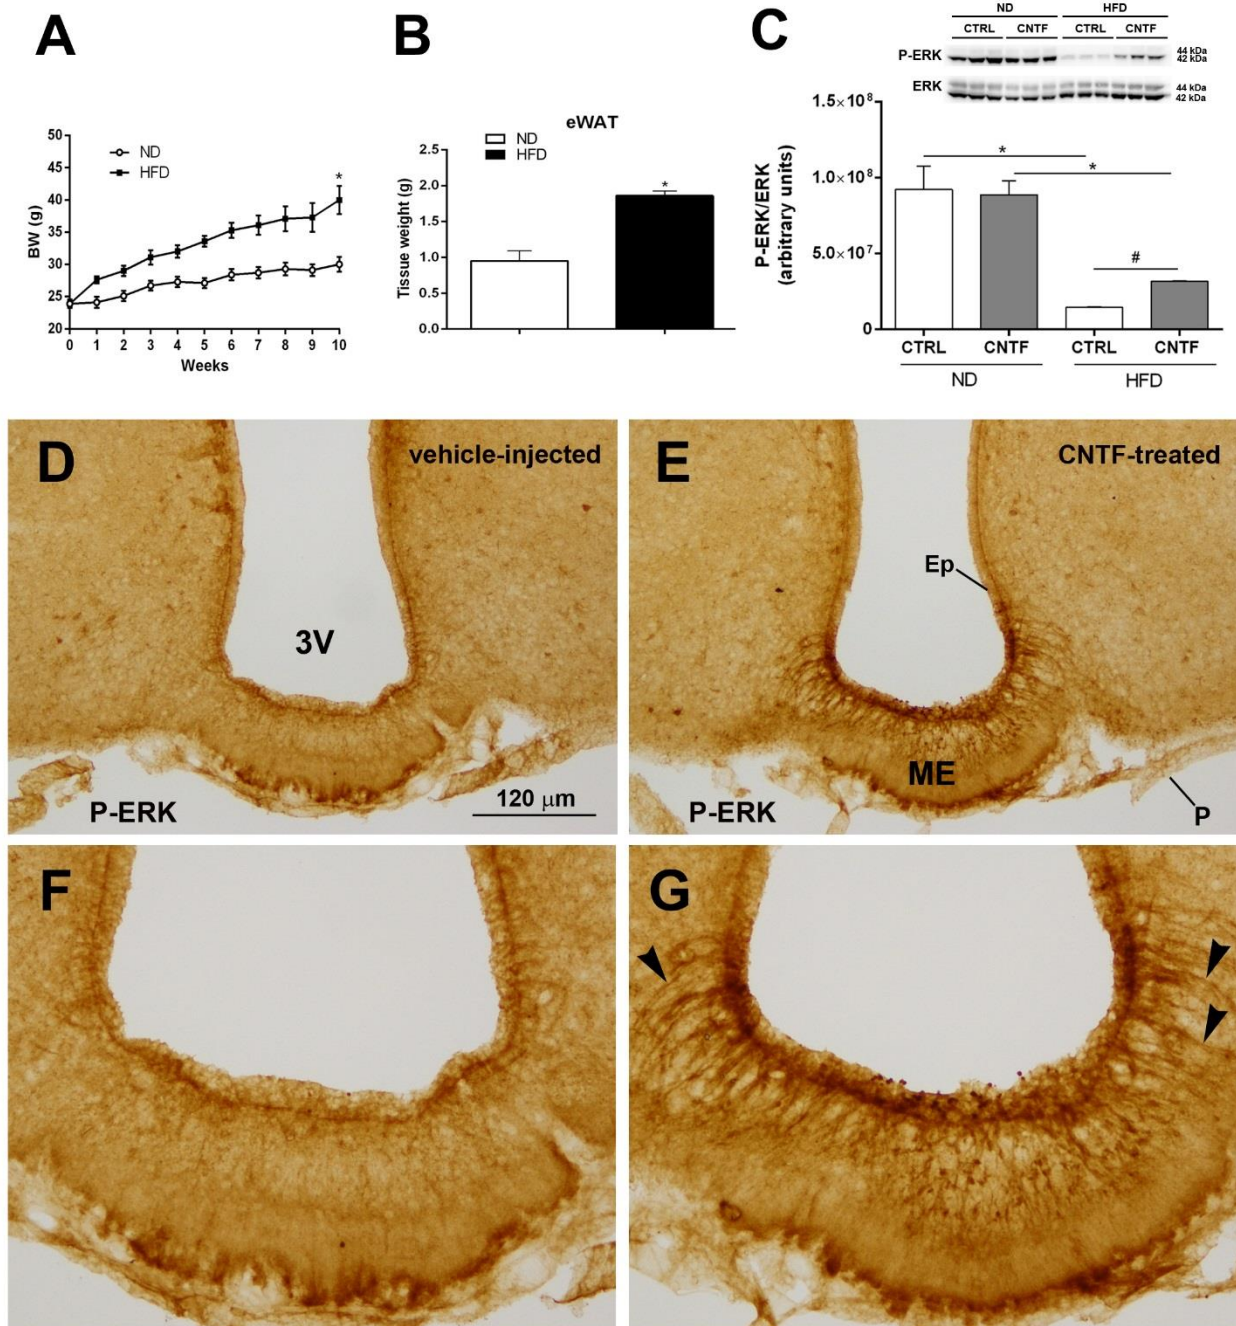

Supplementary figure 2 – Activation of ERK signaling by CNTF in HFD obese mice. A: Body weight of mice fed a normal diet (ND) and a high fat diet (HFD) for 10 weeks. Data (3 mice) are mean ± SEM, (unpaired Student's t-test), \* $p < 0.05$  comparison between ND and HFD mice. B: Tissue weight of the epididymal fat depots from ND and HFD mice. Data (3 mice) are mean ± SEM, (unpaired Student's t-test), \* $p < 0.05$  comparison between ND and HFD mice. C: Representative immunoblot and P-ERK quantification in hypothalamic protein extracts from vehicle-injected (CTRL-ND) and CNTF-treated (CNTF-ND) mice fed a normal diet (ND) and vehicle-injected (CTRL-HFD) and CNTF-treated (CNTF-HFD) mice fed a HFD. Data (3 mice) are mean ± SEM, \* $p < 0.05$  comparison

between ND and HFD mice, #p<0.05 comparison between CNTF-treated and vehicle-injected HFD mice (one-way ANOVA). D-G: Representative immunoperoxidase images showing P-ERK immunoreactivity in a vehicle-injected HFD mouse (D and F) and in a CNTF-treated HFD mouse (E and G). In this latter, arrowheads indicate tanycyte-like projections that are strongly positive for P-ERK. F and G are enlargements of the median eminence (ME) of D and E, respectively. 3V, third ventricle; Ep, ependymal layer, P, pial surface. All pics were taken from coronal hypothalamic sections at bregma – 1.70 mm.
